# Supplementary material for: Solid Tumor Treatment via Augmentation of Bioactive C6 Ceramide Levels with Thermally Ablative Focused Ultrasound
Source: PubMed Central journal article supplement — bioRxiv. 2023 Mar 23:2023.03.23.532394. Preprint. [Version 1] doi: 10.1101/2023.03.23.532394 (PMC10055354; doi:10.1101/2023.03.23.532394), 2023-03-23
Supplement: media-1.pdf [file media-1.pdf]

## ***Supplementary Information***

### **Solid Tumor Treatment via Augmentation of Bioactive C6 Ceramide Levels with Thermally Ablative Focused Ultrasound**

**E. Andrew Thim<sup>1</sup>, Todd Fox<sup>2</sup>, Tye Deering<sup>2</sup>, Luke R. Vass<sup>3</sup>, Natasha D. Sheybani<sup>1</sup>,  
Mark Kester<sup>1,2</sup>, and Richard J. Price<sup>1,\*</sup>**

1. Department of Biomedical Engineering, University of Virginia, Charlottesville, VA 22908

2. Department of Pharmacology, University of Virginia, Charlottesville, VA 22908

3. Department of Pathology, University of Virginia, Charlottesville, VA 22908

\*Corresponding Author:

Richard J. Price, Ph.D.  
Department of Biomedical Engineering  
Box 800759, Health System  
University of Virginia  
Charlottesville, VA 22908, USA  
Telephone: (434) 924-0020  
Email: [rprice@virginia.edu](mailto:rprice@virginia.edu)  
ORCID: 0000-0002-0237-2102

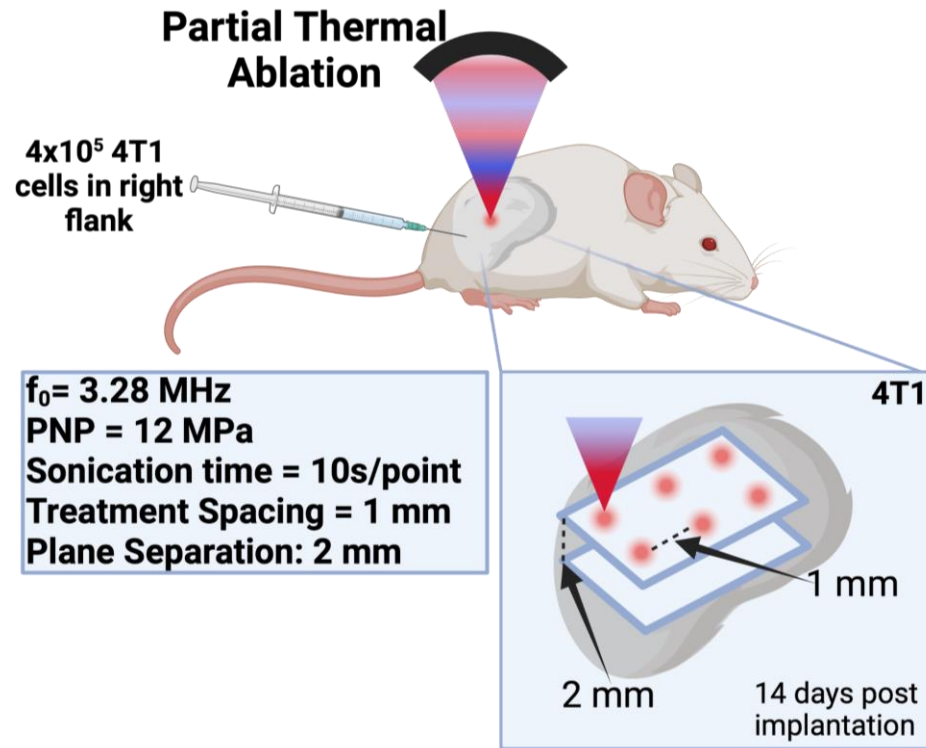

Fig. S1 Treatment scheme for TA of 4T1 tumors. Biorender.com

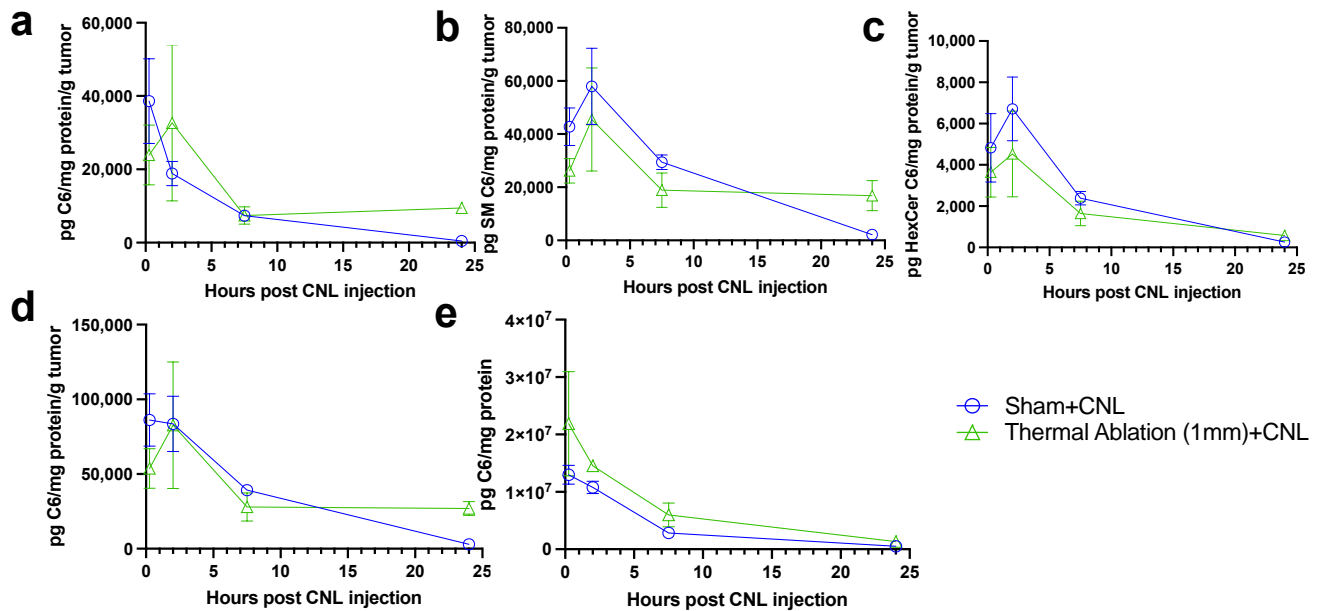

**Fig. S2 C6-ceramide levels through time after TA+CNL treatment. CNLs were injected immediately prior to Sham or TA treatment.** Tumors and serum were harvested 15 minutes (n=5-6), 2 hrs (n=4), 7.5 hrs (n=4-6) and 24 hrs (n=3-5) post treatment. a. Bioactive C6-ceramide levels. b. Levels of C6-ceramide metabolized into sphingomyelin. c. Levels of C6-ceramide metabolized into hexosyl-ceramides. d. Total C6-ceramide levels. e. Bioactive C6-ceramide levels in serum.

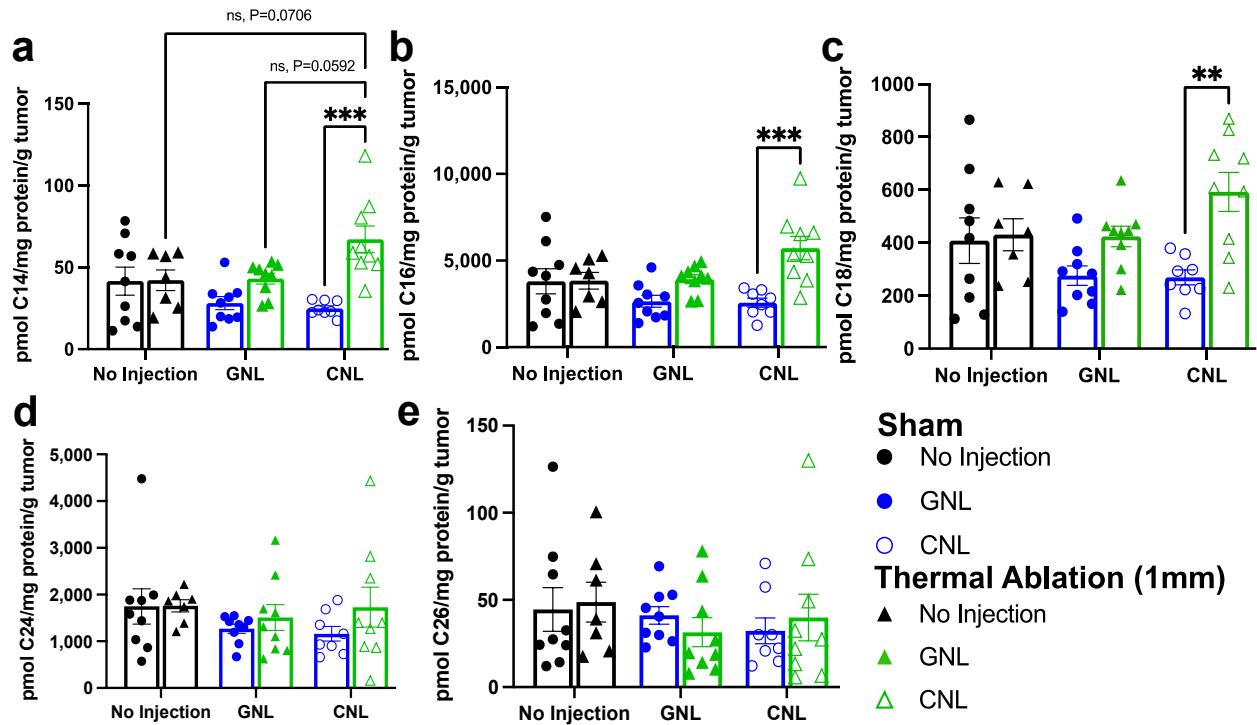

**Fig. S3 Absolute ceramide metabolite levels 24 hrs after Sham or TA treatment in combination with GNL and CNL injection.** Long-chain ceramides (A-C) are C14, C16 and C18. Very-long-chain ceramides (D-E) are C24 and C26. For all data sets: n=7-9 and \*\*p<0.01, \*\*\*p<0.001.
